# Supplementary material for: Assessing Sensory Processing Dysfunction in Adults and Adolescents with Autism Spectrum Disorder: A Scoping Review
Source: PubMed Central journal article supplement (PMC5575628; doi:10.3390/brainsci7080108), 2017-08-19

## SUPPLEMENTARY FILE

## PRISMA Flowchart

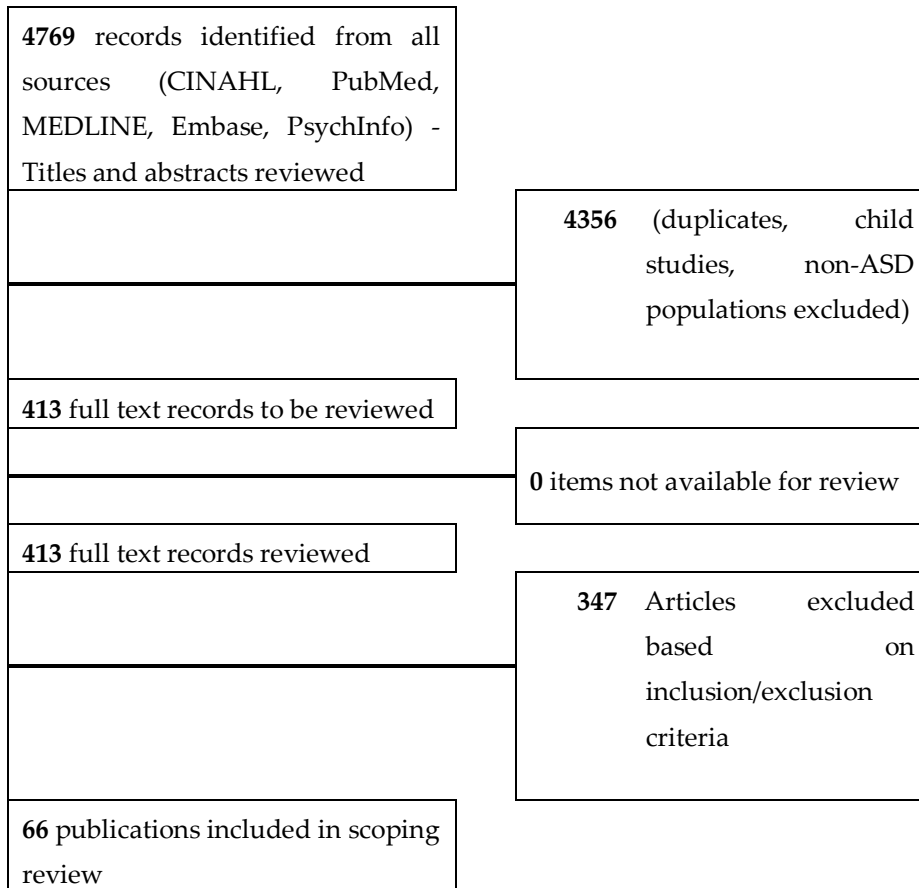

Supplement: brainsci-07-00108-s001.pdf [file brainsci-07-00108-s001.pdf]
